# Supplementary material for: A Phenome-Wide Association Study of genes associated with COVID-19 severity reveals shared genetics with complex diseases in the Million Veteran Program
Source: bioRxiv or medRxiv preprint supplement (doi:10.1101/2021.05.18.21257396), 2021-10-15

Proxies for rs74956615 in EUR

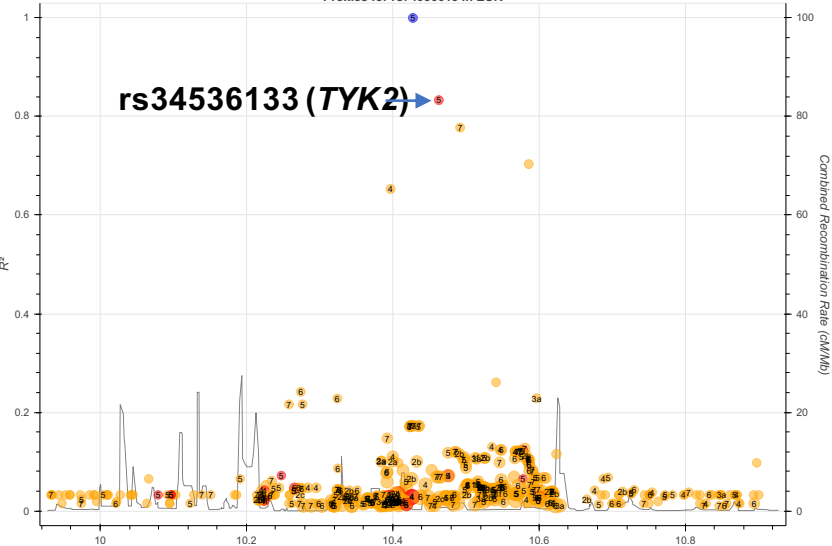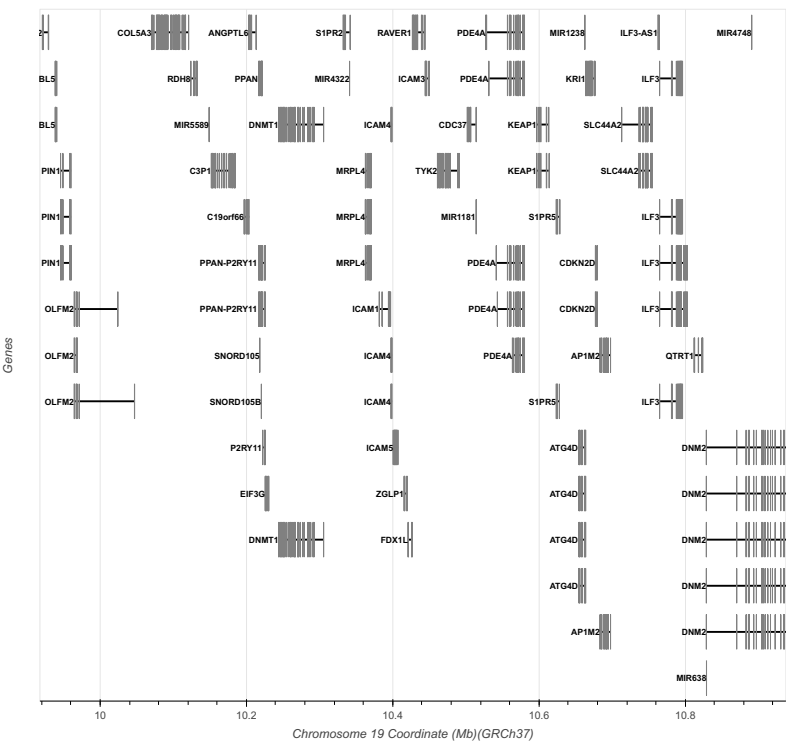

Supplement: Supplementary file [file media-4.pdf]
